# Supplementary material
Source: PubMed Central journal article supplement (PMC8315946)
Supplement: aac.02658-20-s0001.pdf [file aac.02658-20-s0001.pdf]

**TABLE S1.** Induction of conjugation frequencies in reference *E. coli* strain under sub-inhibitory concentration of ciprofloxacin in semi-solid stool medium.

| Strains*                     | Control                                        |   | $\frac{1}{2}$ MIC<br>(0.002 $\mu\text{g/ml}$ )   |   | $\frac{1}{4}$ MIC<br>(0.001 $\mu\text{g/ml}$ ) |             | $\frac{1}{2}$ MIC (0.002 $\mu\text{g/ml}$ )<br>+ EDA (0.1 mM) |     |
|------------------------------|------------------------------------------------|---|--------------------------------------------------|---|------------------------------------------------|-------------|---------------------------------------------------------------|-----|
|                              | CF                                             | X | CF                                               | X | CF                                             | X           | CF                                                            | X   |
| <i>E. coli</i> RZ211 (pOX38) | $3.5 \times 10^{-1}$<br>$\pm 4 \times 10^{-1}$ | 1 | $6.3 \times 10^{-1}$<br>$\pm 1.4 \times 10^{-2}$ | 2 | $1.5 \times 10^0$<br>$\pm 1.7 \times 10^{-1}$  | <b>4.3*</b> | $1.5 \times 10^{-1}$<br>$\pm 1.1 \times 10^{-1}$              | 0.5 |

\*Fold changes (X) and conjugation frequencies (CF) observed for plasmid pOX38

**TABLE S2.** Ciprofloxacin minimal inhibitory concentration for model *E. coli* RZ211 strain with and without edaravone.

| Minimal Inhibitory Concentrations |                            |
|-----------------------------------|----------------------------|
|                                   | <i>E. coli</i> RZ211 pOX38 |
| CIP                               | 0.004                      |
| CIP + 0.1 mM EDA                  | 0.004                      |

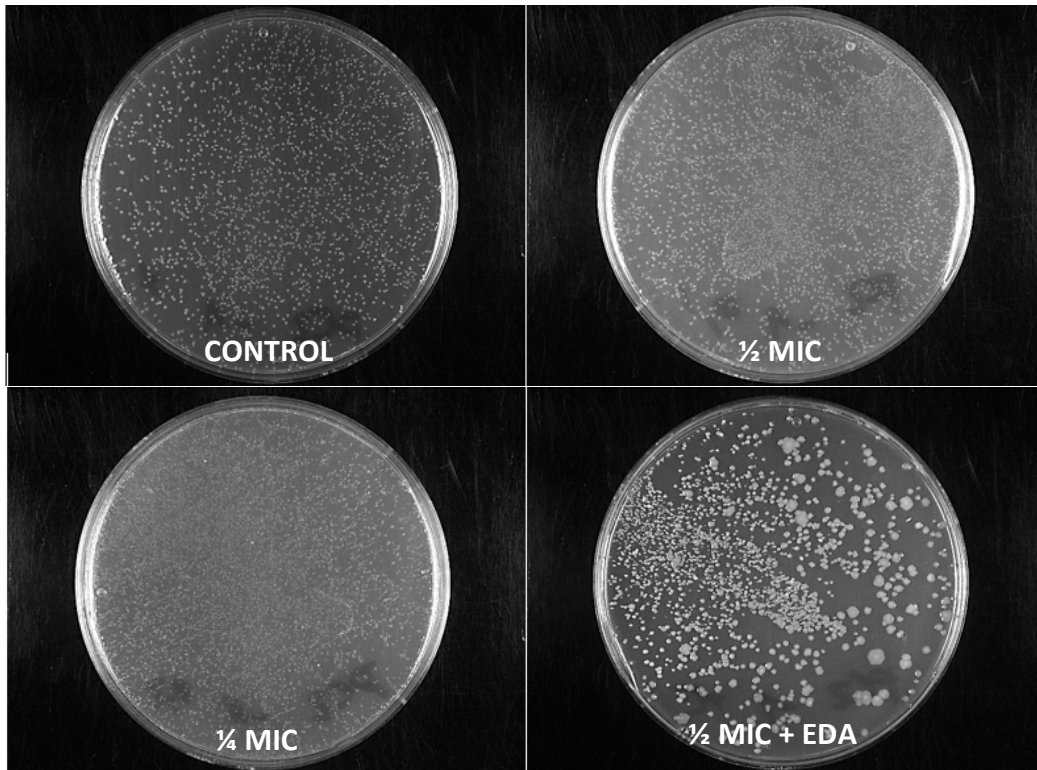

**FIG S1.** Plates corresponding to mating-out assays with *E. coli* RZ211 (pOX38) as donor under ciprofloxacin exposure on semi-solid stool medium.

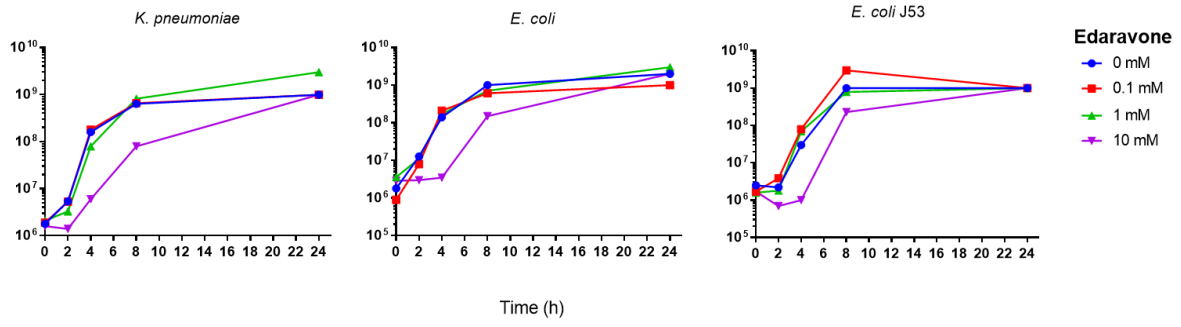

**FIG S2.** Growth curves in presence of different concentrations of edaravone.

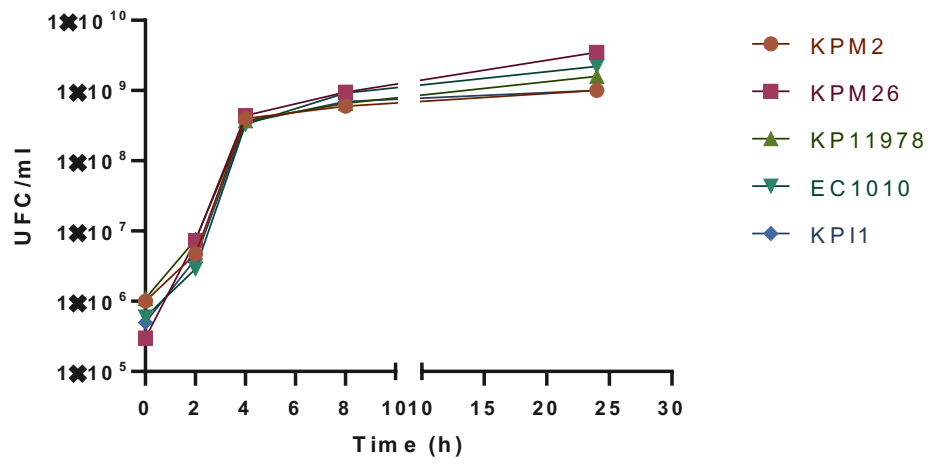

**FIG S3.** Growth curves for the different clinical strains.
